# Supplementary material for: Elemental Fingerprinting of Pecorino Romano and Pecorino Sardo PDO: Characterization, Authentication and Nutritional Value
Source: MDPI journal article supplement (doi:10.3390/molecules29040869), 2024-02-16
Supplement: s1 [file s1]

# Elemental fingerprinting of Pecorino Romano and Pecorino Sardo

## PDO: Characterisation, Authentication and Nutritional Value

**Andrea Mara <sup>1,\*</sup>, Marco Caredda <sup>2</sup>, Margherita Addis <sup>2</sup>, Francesco Sanna <sup>3</sup>, Mario Deroma <sup>4</sup>,**

**Constantinos A. Georgiou <sup>5,6</sup>, Ilaria Langasco <sup>1</sup>, Maria I. Pilo <sup>1</sup>, Nadia Spano <sup>1</sup> and Gavino Sanna <sup>1,\*</sup>**

<sup>1</sup> Department of Chemical, Physical, Mathematical and Natural Sciences, University of Sassari, Via Vienna 2, I-07100 Sassari, Italy; ilangasco@uniss.it (I.L.); mpilo@uniss.it (M.I.P.); nspano@uniss.it (N.S.)

<sup>2</sup> Department of Animal Science, Agris Sardegna, S.S. 291 Sassari-Fertilia, Km. 18,600, I-07040 Sassari, Italy; mcareda@agrisricerca.it (M.C.); maddis@agrisricerca.it (M.A.)

<sup>3</sup> Department of Environmental Studies, Crop Protection and Production Quality Agris Sardegna, Viale Trieste 111, I-09123 Cagliari, Italy; fsanna@agrisricerca.it

<sup>4</sup> Department of Agriculture, University of Sassari, Viale Italia, 39A, I-07100 Sassari, Italy; mderoma@uniss.it

<sup>5</sup> Chemistry Laboratory, Department of Food Science and Human Nutrition, Agricultural University of Athens, 75 Iera Odos, 118 55 Athens, Greece; cag@aua.gr

<sup>6</sup> FoodOmics.GR Research Infrastructure, Agricultural University of Athens, 118 55 Athens, Greece

\* Correspondence: a.mara@studenti.uniss.it (A.M.); sanna@uniss.it (G.S.); Tel.: +39-079229500 (G.S.)

## Supplementary Material

|                                                                                                                                                                      |           |
|----------------------------------------------------------------------------------------------------------------------------------------------------------------------|-----------|
| <b>Figure S1. PCA analysis performed on Pecorino Sardo and Pecorino Romano produced by 3 farms in the same period: (a) loading plot; (b) score plot.....</b>         | <b>3</b>  |
| <b>Figure S2. PCA analysis performed on Pecorino Romano samples and 14 elements: (a) loading plot; (b) score plot. Object coloured according to seasonality.....</b> | <b>4</b>  |
| <b>Figure S3. ANOVA analysis of macro and trace elements in Pecorino Romano PDO as a function of the seasonality.....</b>                                            | <b>5</b>  |
| <b>Figure S4. PCA analysis performed on Pecorino Sardo samples and 14 elements: (a) loading plot; (b) score plot. Object coloured according to seasonality. ....</b> | <b>6</b>  |
| <b>Figure S5. ANOVA analysis of macro and trace elements in Pecorino Sardo as a function of the seasonality. ....</b>                                                | <b>7</b>  |
| <b>Table S1. Average elemental composition of Pecorino cheeses measured in this study and from literature data.....</b>                                              | <b>8</b>  |
| <b>Table S2. Instrumental conditions of the ICP-OES OPTIMA 7300 DV, Perkin Elmer.....</b>                                                                            | <b>9</b>  |
| <b>Table S3. Instrumental conditions of the ICP-MS NexION 350X, Perkin Elmer. ....</b>                                                                               | <b>10</b> |
| <b>Table S4. Validation parameters of the ICP-MS method for the elemental analysis of Pecorino cheeses. ....</b>                                                     | <b>11</b> |
| <b>Table S5. Analysis of the CRM ERM BD-151 (skimmed milk powder).....</b>                                                                                           | <b>12</b> |

**Figure S1. Principal component analysis performed on Pecorino Sardo and Pecorino Romano produced by 3 farms in the same period: (a) loading plot; (b) score plot.**

Figure S1a

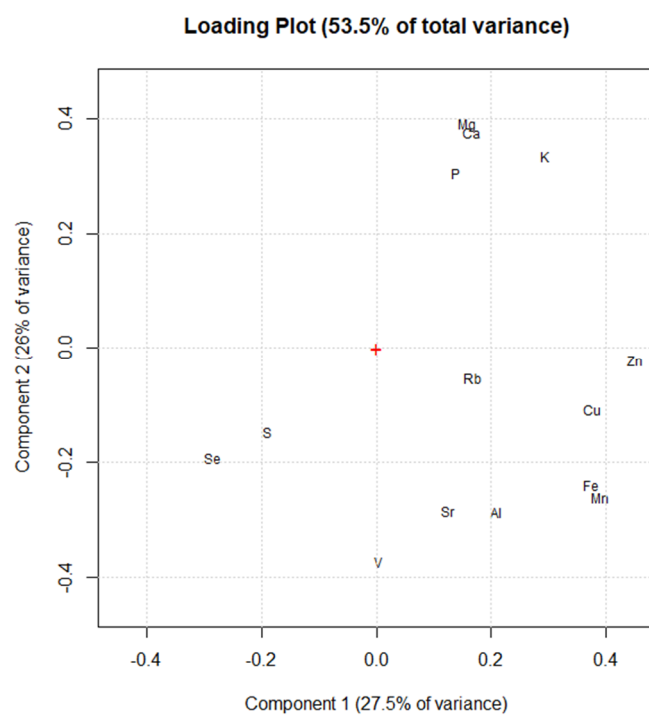

Figure S1b

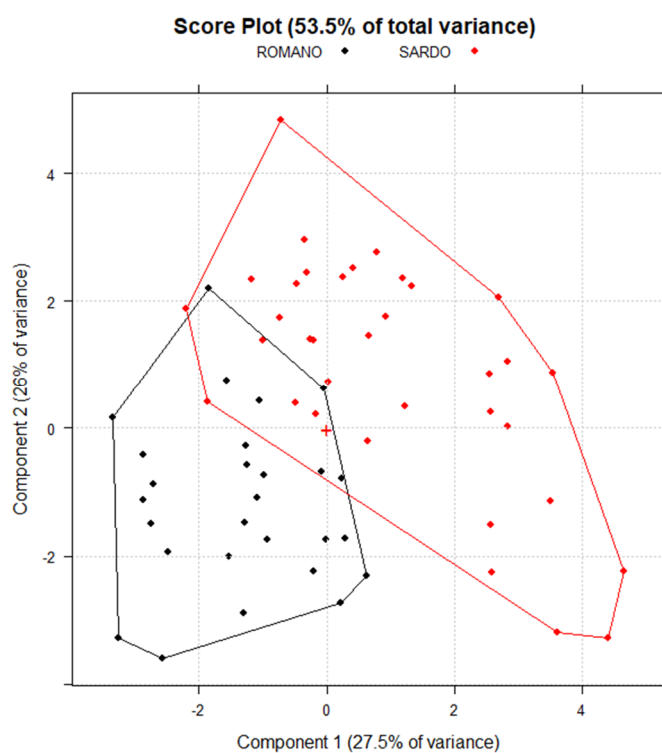

**Figure S2. Principal component analysis performed on Pecorino Romano samples and 14 elements: (a) loading plot; (b) score plot. Object coloured according to seasonality.**

Figure S2a

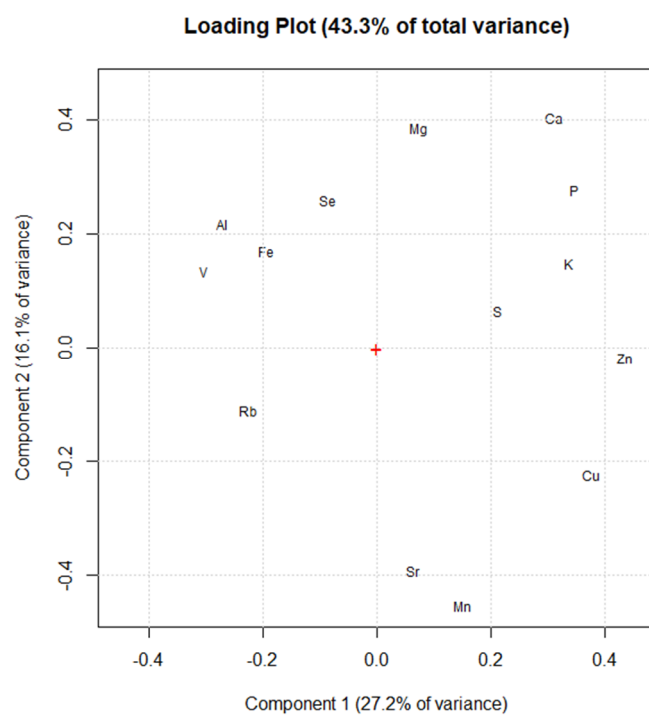

Figure S2b

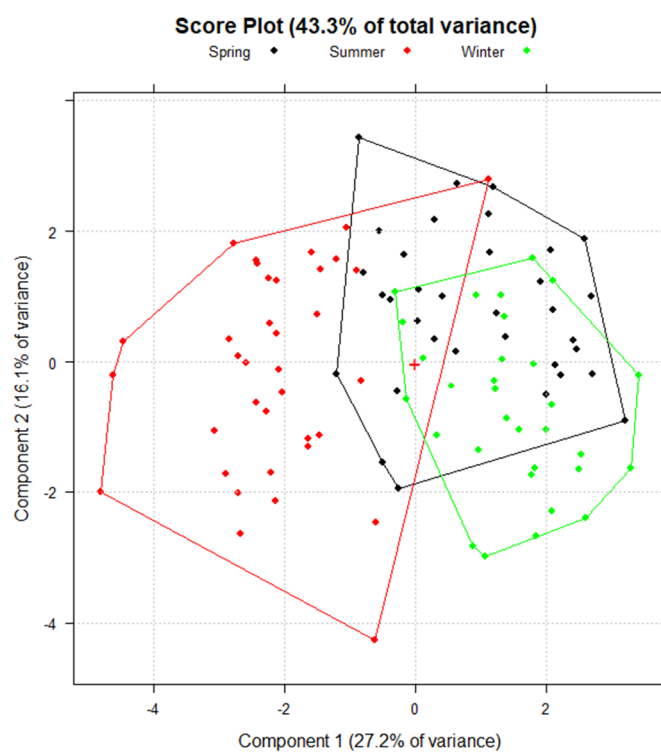

**Figure S3. ANOVA analysis of macro and trace elements in Pecorino Romano PDO as a function of the seasonality.**

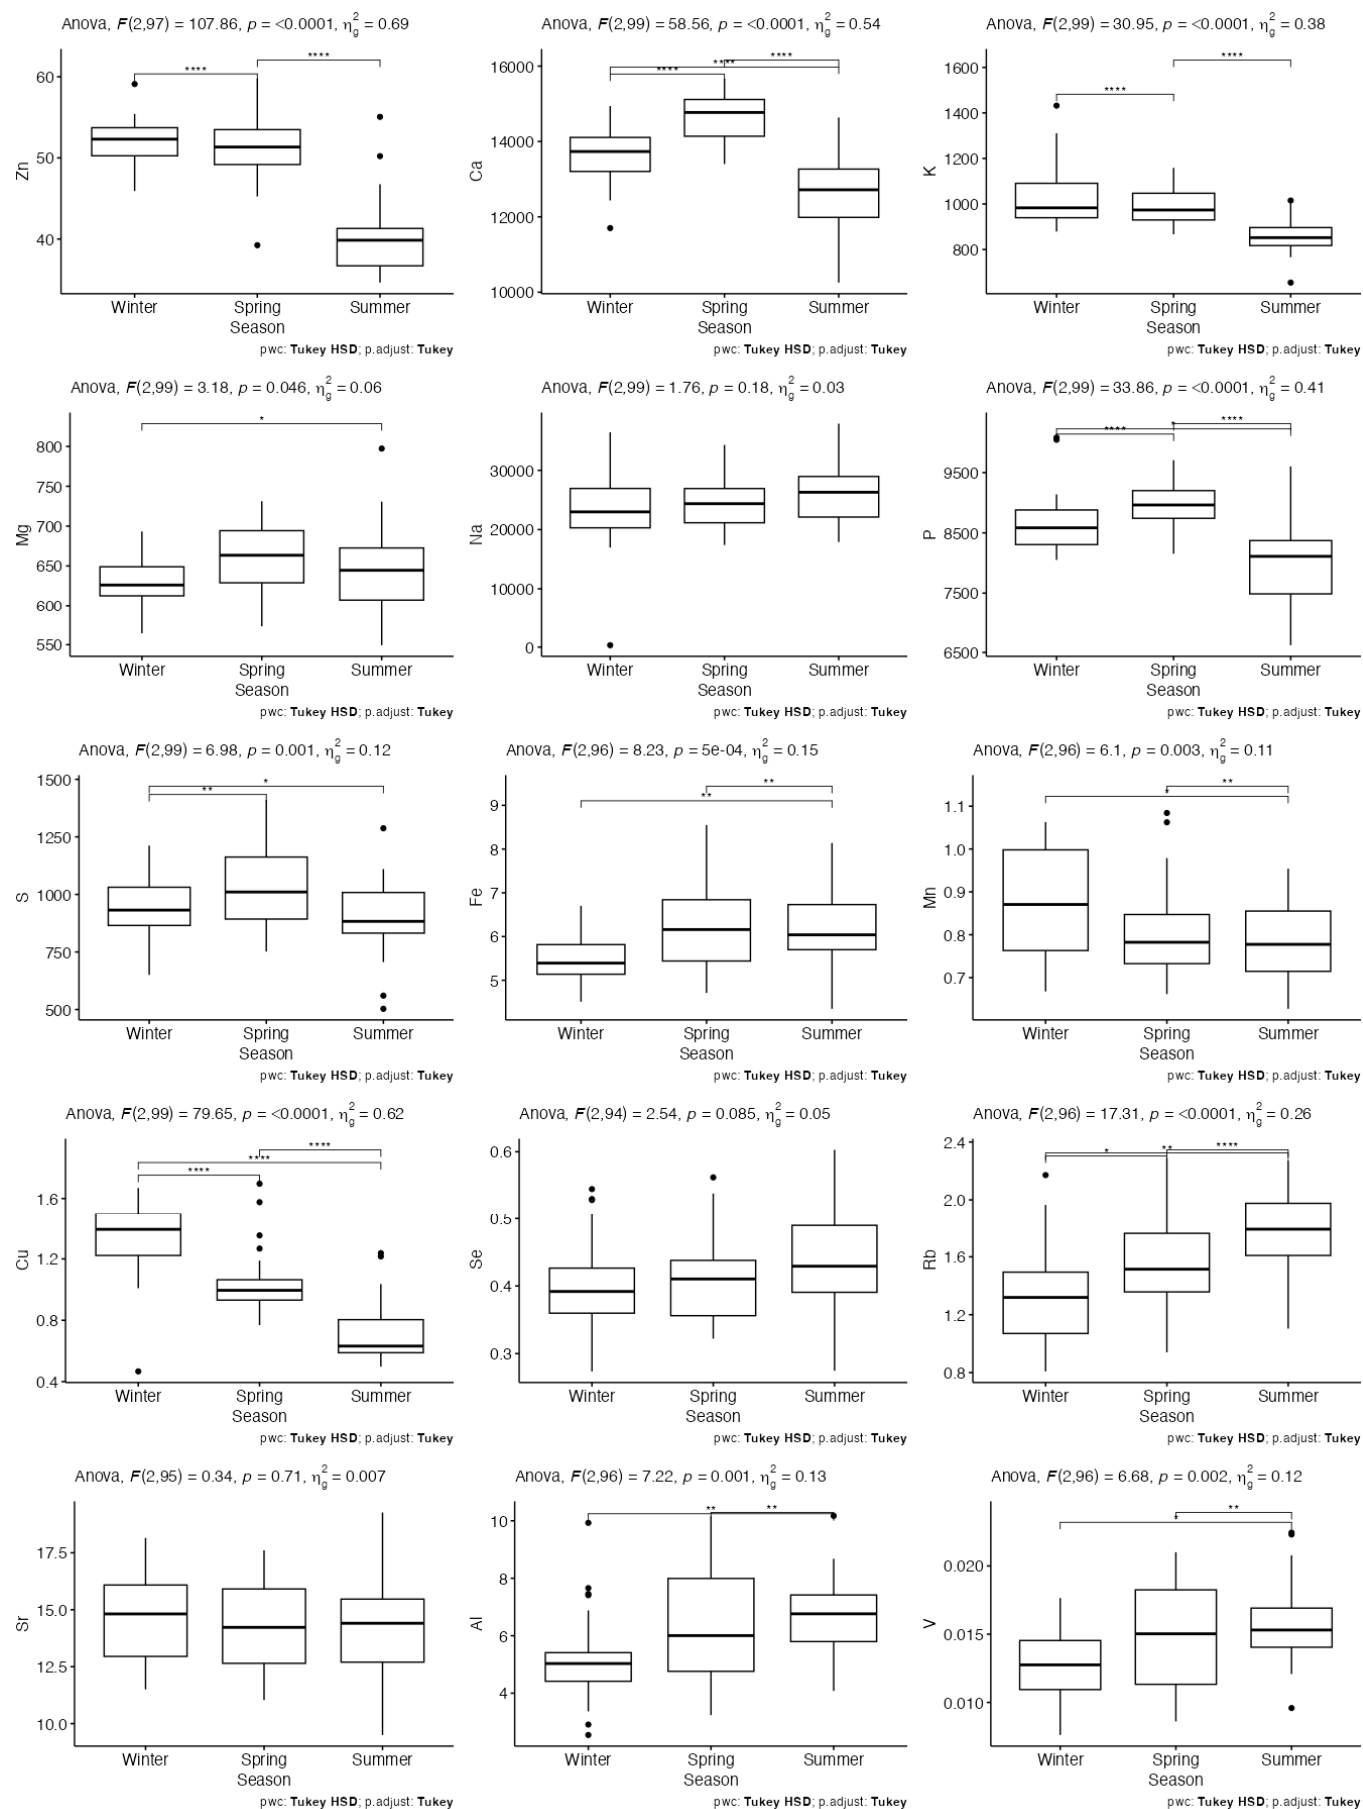

**Figure S4. Principal component analysis performed on Pecorino Sardo samples and 14 elements: (a) loading plot; (b) score plot. Object coloured according to seasonality.**

Figure S4a

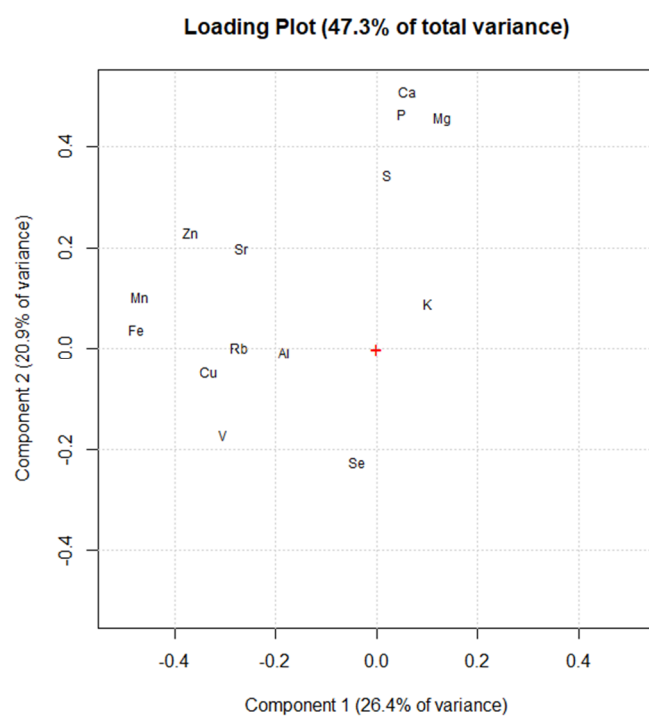

Figure S4b

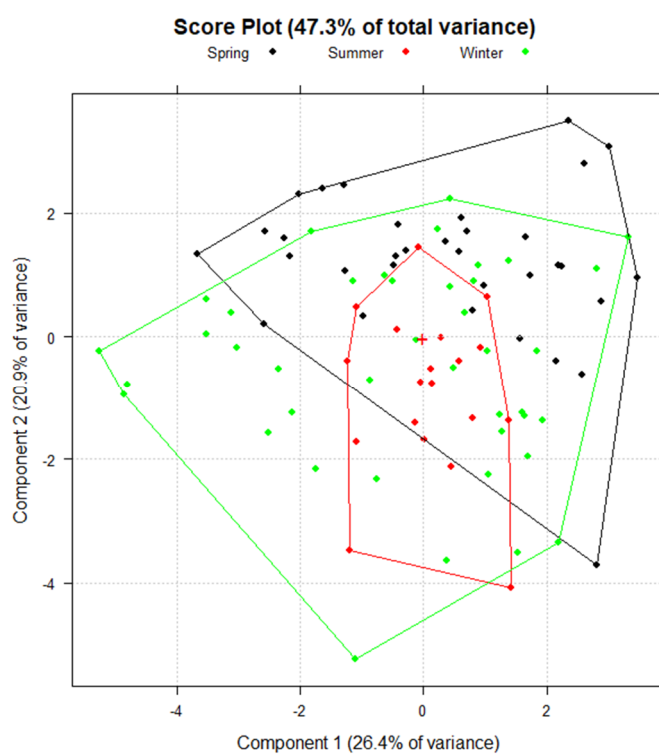

**Figure S5. ANOVA analysis of macro and trace elements in Pecorino Sardo as a function of the seasonality.**

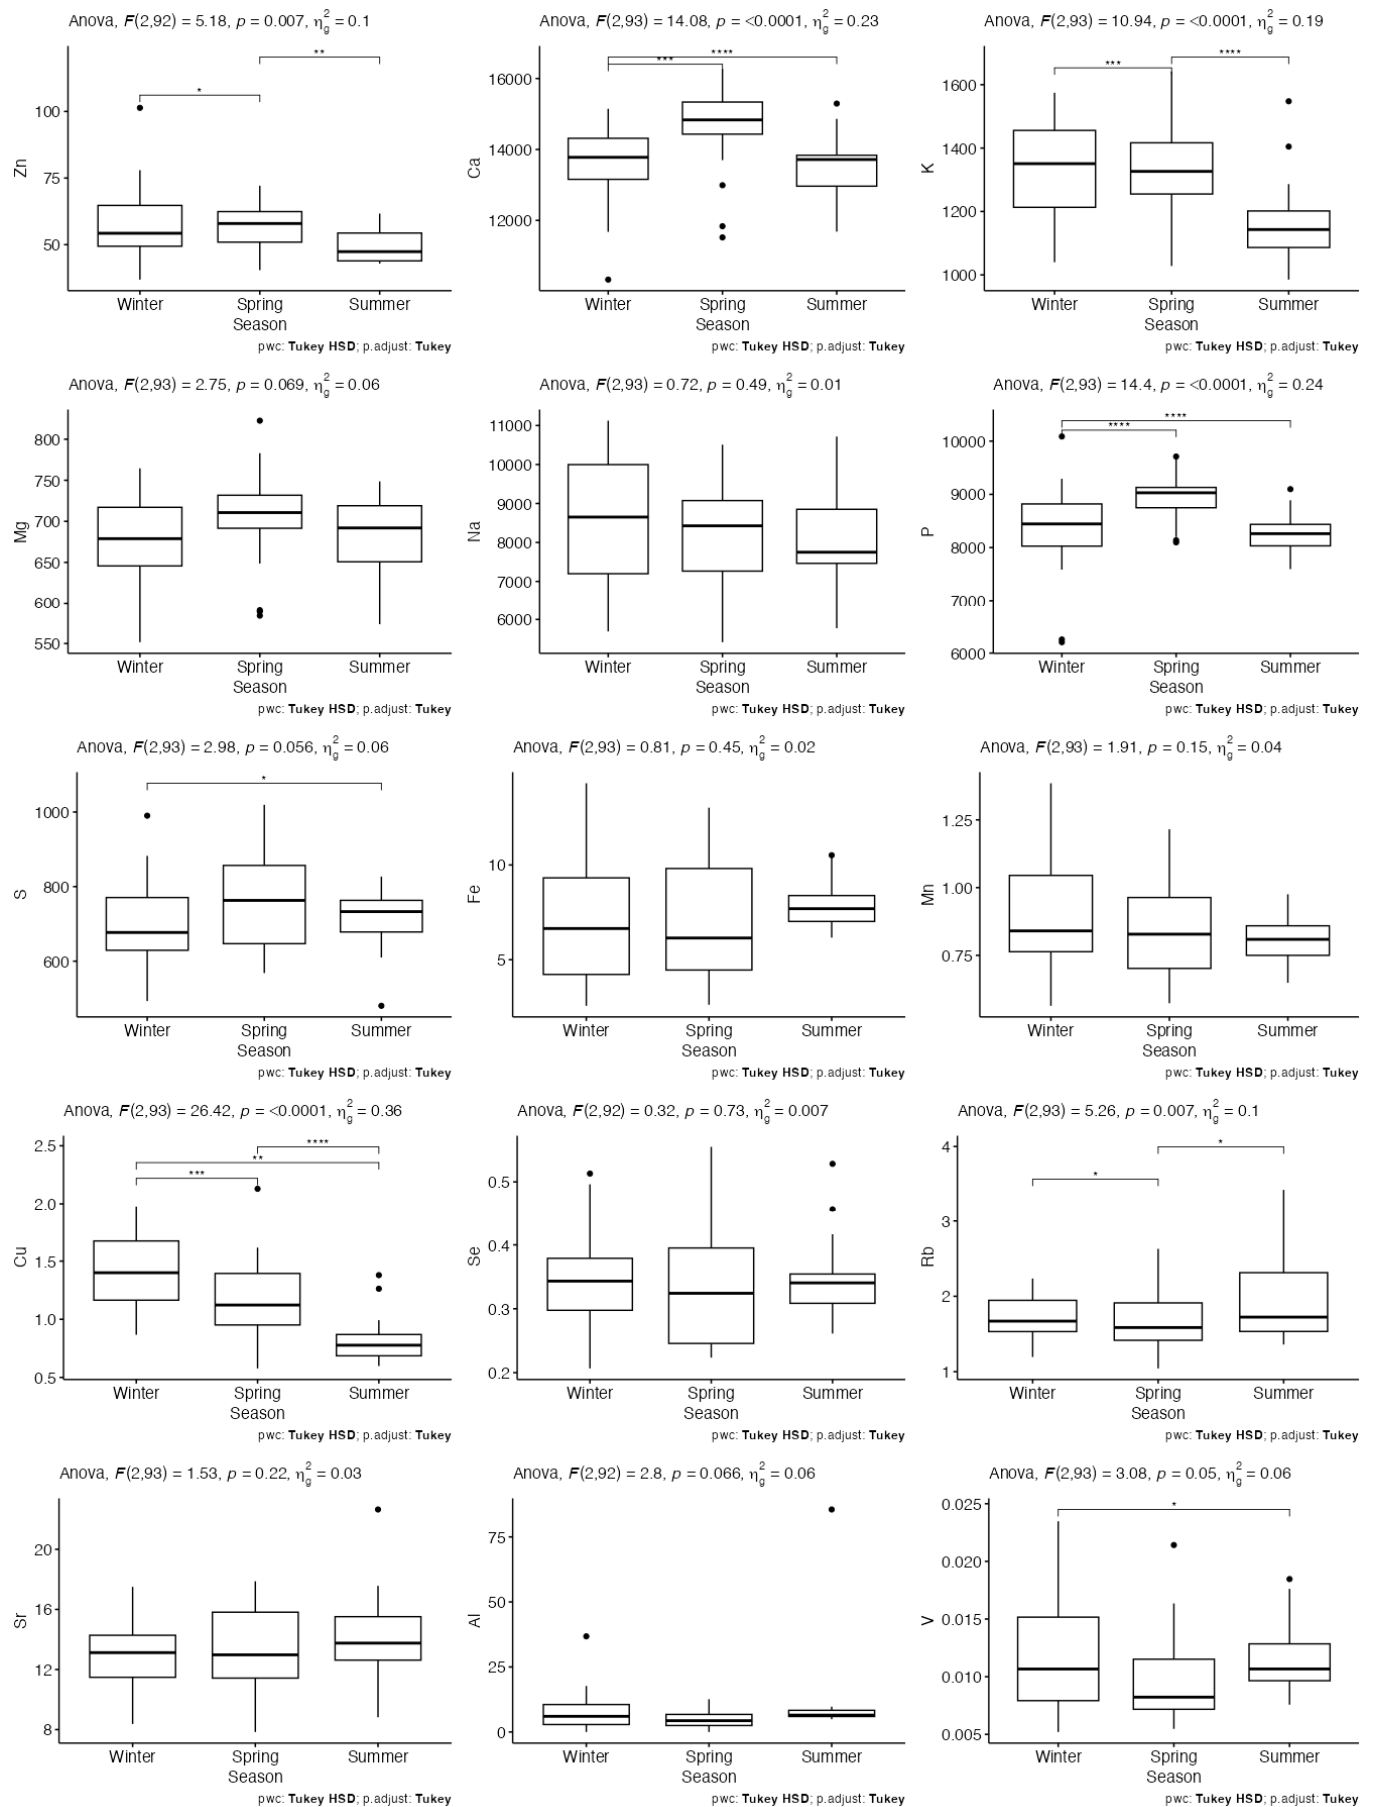

**Table S1. Average elemental composition of Pecorino cheeses measured in this study and from literature data.**

| Elements                                |    | Pecorino Romano PDO |                     |                        | Pecorino Sardo PDO  |                       | Other Italian Pecorino <sup>a</sup> |                     |
|-----------------------------------------|----|---------------------|---------------------|------------------------|---------------------|-----------------------|-------------------------------------|---------------------|
|                                         |    | Ref [57],<br>n = 7  | Ref [28],<br>n = 17 | This study,<br>n = 103 | Ref [28],<br>n = 20 | This study,<br>n = 97 | Ref [56],<br>n = 10                 | Ref [28],<br>n = 16 |
| Macro (mg kg <sup>-1</sup> )            | Ca |                     | 13000               | 14000 ± 1000           | 13000               | 14000 ± 1000          | 7280                                | 12000               |
|                                         | K  |                     | 1100                | 1000 ± 100             | 1500                | 1300 ± 200            | 1430                                | 1700                |
|                                         | Mg | 221                 | 730                 | 600 ± 40               | 700                 | 700 ± 50              | 330                                 | 650                 |
|                                         | Na |                     | 21000               | 25000 ± 5000           | 10000               | 8000 ± 1000           | 7820                                | 11000               |
|                                         | P  |                     | 9000                | 9000 ± 700             | 8000                | 9000 ± 500            | 4300                                | 8000                |
|                                         | S  |                     |                     | 1000 ± 200             |                     | 700 ± 100             | 1300                                |                     |
| Trace and toxic (μ g kg <sup>-1</sup> ) | Ag |                     |                     | 5 ± 5                  |                     | 5 ± 5                 |                                     |                     |
|                                         | Al | 2250                |                     | 6000 ± 2000            |                     | 6000 ± 3000           |                                     |                     |
|                                         | As |                     |                     | 8 ± 1                  |                     | 6 ± 1                 |                                     |                     |
|                                         | Ba | 1730                | 3500                |                        | 2700                |                       |                                     | 1200                |
|                                         | B  |                     |                     | 8000 ± 8000            |                     | 2000 ± 2000           |                                     |                     |
|                                         | Bi |                     |                     | 2 ± 1                  |                     | < 0.5                 |                                     |                     |
|                                         | Cd | 25                  |                     | 1.2 ± 0.5              |                     | 1 ± 0.5               |                                     |                     |
|                                         | Co | 26                  |                     | 4 ± 1                  |                     | 4 ± 1                 |                                     |                     |
|                                         | Cr | 40                  |                     | 20 ± 10                |                     | 40 ± 20               |                                     |                     |
|                                         | Cu | 550                 |                     | 1000 ± 350             |                     | 1200 ± 500            | 600                                 |                     |
|                                         | Hg |                     |                     | < 30                   |                     | < 30                  |                                     |                     |
|                                         | Fe | 2470                | 3800                | 6000 ± 950             | 2500                | 7000 ± 3000           | 3380                                | 2400                |
|                                         | Li |                     |                     | < 55                   |                     | < 55                  |                                     |                     |
|                                         | Mn | 270                 |                     | 800 ± 100              |                     | 850 ± 100             |                                     |                     |
|                                         | Ni | 460                 |                     | 27 ± 5                 |                     | 30 ± 10               |                                     |                     |
|                                         | Pb | 19                  |                     | 20 ± 10                |                     | 20 ± 10               |                                     |                     |
|                                         | Pt | 132                 |                     |                        |                     |                       |                                     |                     |
|                                         | Rb |                     |                     | 1600 ± 500             |                     | 1700 ± 500            |                                     |                     |
|                                         | Sb |                     |                     | 10 ± 5                 |                     | 12 ± 5                |                                     |                     |
|                                         | Se |                     |                     | 400 ± 100              |                     | 340 ± 90              | 780                                 |                     |
|                                         | Sn |                     |                     | 10 ± 10                |                     | 20 ± 10               |                                     |                     |
|                                         | Sr | 1880                |                     | 14300 ± 2500           |                     | 13400 ± 2500          |                                     |                     |
|                                         | Te |                     |                     | 9 ± 5                  |                     | 130 ± 50              |                                     |                     |
|                                         | Tl |                     |                     | < 0.5                  |                     | 1.9 ± 0.5             |                                     |                     |
|                                         | U  |                     |                     | 2 ± 1                  |                     | 1 ± 1                 |                                     |                     |
|                                         | V  |                     |                     | 15 ± 5                 |                     | 10 ± 5                |                                     |                     |
|                                         | Zn | 18800               | 49000               | 47000 ± 7500           | 48000               | 56000 ± 9000          | 21750                               | 40000               |

a) no-PDO cheeses



**Table S2. Instrumental conditions of the ICP-OES OPTIMA 7300 DV, Perkin Elmer**

| ICP-OES OPTIMA 7300 DV, Perkin Elmer                   |                      |
|--------------------------------------------------------|----------------------|
| RF power generator (W)                                 | 1300                 |
| Ar plasma flow (dm <sup>3</sup> min <sup>-1</sup> )    | 15.0                 |
| Ar auxiliary flow (dm <sup>3</sup> min <sup>-1</sup> ) | 0.20                 |
| Ar nebulizer flow (dm <sup>3</sup> min <sup>-1</sup> ) | 0.80                 |
| Nebulizer                                              | GemTip Cross-Flow II |

**Table S3. Instrumental conditions of the ICP-MS NexION 350X, Perkin Elmer.**

| ICP-MS NexION 350X, Perkin Elmer                       |                 |                               |                                                          |
|--------------------------------------------------------|-----------------|-------------------------------|----------------------------------------------------------|
| RF power generator (W)                                 | 1400            | KED cell entrance voltage (V) | -8                                                       |
| Ar plasma flow (dm <sup>3</sup> min <sup>-1</sup> )    | 18.0            | KED cell exit voltage (V)     | -38                                                      |
| Ar auxiliary flow (dm <sup>3</sup> min <sup>-1</sup> ) | 1.40            | Resolution (Da)               | 0.7                                                      |
| Ar nebulizer flow (dm <sup>3</sup> min <sup>-1</sup> ) | 0.90            | Scan mode                     | Peak hopping                                             |
| KED He flow (cm <sup>3</sup> min <sup>-1</sup> )       | 4.60            | Detector mode                 | Dual                                                     |
| Nebulizer                                              | Meinhardt glass | Dwell time (ms)               | 50                                                       |
| Spray chamber                                          | Cyclonic glass  | Number of points per peak     | 3                                                        |
| Skimmer and sampling cones                             | Nickel          | Acquisition time (s)          | 6                                                        |
| Deflector voltage (V)                                  | -10             | Acquisition dead time (ns)    | 35                                                       |
| Analog stage voltage (V)                               | -2350           | KED gas                       | Helium, 99.999%                                          |
| Pulse stage voltage (V)                                | 1800            | Masses of optimization        | <sup>7</sup> Li, <sup>115</sup> In and <sup>208</sup> Pb |

Gas nebuliser optimisation:  $^{141}\text{Ce}^{16}\text{O}^+ / ^{141}\text{Ce}^+ < 0.03$  (NexION Setup Solution);

KED hi-flow optimisation:  $^{35}\text{Cl}^{16}\text{O}^+ / ^{59}\text{Co}^+ < 0.005$  (NexION KED Solution).

**Table S4. Validation parameters of the ICP-MS method for the elemental analysis of Pecorino cheeses.**

| Element           | Mode | Calibration<br>Range<br>( $\mu\text{g dm}^{-3}$ ) | R <sup>2</sup> | LoD<br>( $\mu\text{g kg}^{-1}$ ) | LoQ<br>( $\mu\text{g kg}^{-1}$ ) | CV% <sub>r</sub> | CV% <sub>IP</sub> | Recovery % |
|-------------------|------|---------------------------------------------------|----------------|----------------------------------|----------------------------------|------------------|-------------------|------------|
| <sup>107</sup> Ag | STD  | 0.1 - 50                                          | 0.99996        | 0.5                              | 1.6                              | 11%              | 21%               | 86 ± 1     |
| <sup>27</sup> Al  | KED  | 0.5 - 200                                         | 0.99999        | 35                               | 115                              | 16%              | 24%               | 105 ± 1    |
| <sup>75</sup> As  | KED  | 0.1 - 200                                         | 0.99996        | 1.0                              | 3.3                              | 7%               | 24%               | 149 ± 7    |
| <sup>11</sup> B   | STD  | 0.5 - 200                                         | 0.99995        | 16                               | 54                               | 6%               | 13%               | 111 ± 4    |
| <sup>209</sup> Bi | STD  | 0.05 - 50                                         | 1.00000        | 0.1                              | 0.5                              | 9%               | 21%               | 88 ± 2     |
| <sup>111</sup> Cd | KED  | 0.05 - 100                                        | 1.00000        | 0.03                             | 0.10                             | 7%               | 17%               | 89 ± 1     |
| <sup>59</sup> Co  | KED  | 0.1 - 200                                         | 1.00000        | 0.02                             | 0.08                             | 4%               | 15%               | 102 ± 1    |
| <sup>52</sup> Cr  | KED  | 0.1 - 200                                         | 0.99997        | 0.9                              | 3.1                              | 9%               | 12%               | 102 ± 1    |
| <sup>63</sup> Cu  | KED  | 0.1 - 500                                         | 1.00000        | 60                               | 200                              | 6%               | 16%               | 101 ± 2    |
| <sup>57</sup> Fe  | KED  | 0.1 - 500                                         | 0.99996        | 29                               | 90                               | 9%               | 19%               | 112 ± 1    |
| <sup>202</sup> Hg | STD  | 0.1 - 50                                          | 0.99987        | 9                                | 30                               | 13%              | 18%               | 88 ± 6     |
| <sup>7</sup> Li   | STD  | 0.1 - 200                                         | 0.99995        | 17                               | 55                               | 4%               | 12%               | 106 ± 5    |
| <sup>55</sup> Mn  | KED  | 0.1 - 500                                         | 1.00000        | 0.4                              | 1.2                              | 5%               | 23%               | 103 ± 1    |
| <sup>60</sup> Ni  | KED  | 0.1 - 200                                         | 0.99998        | 3.20                             | 10.0                             | 8%               | 17%               | 96 ± 2     |
| <sup>208</sup> Pb | STD  | 0.05 - 100                                        | 0.99996        | 1.0                              | 3.4                              | 8%               | 14%               | 95 ± 1     |
| <sup>85</sup> Rb  | STD  | 0.1 - 500                                         | 0.99999        | 0.2                              | 0.7                              | 5%               | 14%               | 101 ± 1    |
| <sup>121</sup> Sb | KED  | 0.1 - 50                                          | 1.00000        | 1.1                              | 3.6                              | 8%               | 15%               | 99 ± 1     |
| <sup>82</sup> Se  | KED  | 0.1 - 500                                         | 0.99999        | 2.3                              | 7.6                              | 9%               | 19%               | 147 ± 3    |
| <sup>118</sup> Sn | KED  | 0.1 - 50                                          | 1.00000        | 0.7                              | 2.4                              | 5%               | 14%               | 97 ± 2     |
| <sup>88</sup> Sr  | STD  | 0.1 - 500                                         | 0.99999        | 0.8                              | 2.6                              | 4%               | 15%               | 109 ± 2    |
| <sup>130</sup> Te | STD  | 0.1 - 50                                          | 0.99999        | 0.4                              | 1.2                              | 4%               | 17%               | 107 ± 5    |
| <sup>105</sup> Tl | STD  | 0.05 - 50                                         | 0.99998        | 0.1                              | 0.5                              | 4%               | 18%               | 83 ± 1     |
| <sup>238</sup> U  | STD  | 0.05 - 50                                         | 0.99998        | 0.06                             | 0.19                             | 9%               | 18%               | 101 ± 1    |
| <sup>51</sup> V   | KED  | 0.1 - 200                                         | 0.99998        | 0.2                              | 0.6                              | 3%               | 18%               | 109 ± 2    |
| <sup>66</sup> Zn  | KED  | 0.1 - 500                                         | 0.99997        | 90                               | 300                              | 6%               | 18%               | 115 ± 4    |

CV%<sub>r</sub>, Variation coefficient (repeatability); CV%<sub>IP</sub>, Variation coefficient (intermediate precision)

**Table S5. Analysis of the CRM ERM BD-151 (skimmed milk powder)**

| Macro elements <sup>a</sup> | Certified value (g kg <sup>-1</sup> )  | Experimental value (g kg <sup>-1</sup> , n=3)  | Trueness % |
|-----------------------------|----------------------------------------|------------------------------------------------|------------|
| Ca                          | 13.9 ± 0.7                             | 14.7 ± 0.6                                     | 106 ± 4    |
| K                           | 17.0 ± 0.8                             | 17.7 ± 0.5                                     | 104 ± 3    |
| Mg                          | 1.26 ± 0.07                            | 1.31 ± 0.04                                    | 104 ± 3    |
| Na                          | 4.19 ± 0.23                            | 4.8 ± 0.2                                      | 114 ± 5    |
| P                           | 11.0 ± 0.6                             | 9.8 ± 0.6                                      | 89 ± 5     |
| Trace elements <sup>b</sup> | Certified value (mg kg <sup>-1</sup> ) | Experimental value (mg kg <sup>-1</sup> , n=3) | Trueness % |
| Cd                          | 0.106 ± 0.013                          | 0.098 ± 0.005                                  | 92 ± 5     |
| Cu                          | 5.00 ± 0.23                            | 4.7 ± 0.2                                      | 94 ± 4     |
| Fe                          | 53 ± 4                                 | 49 ± 3                                         | 92 ± 6     |
| Mn                          | 0.29 ± 0.03                            | 0.28 ± 0.01                                    | 97 ± 4     |
| Pb                          | 0.207 ± 0.014                          | 0.215 ± 0.005                                  | 104 ± 2    |
| Se                          | 0.19 ± 0.04                            | 0.21 ± 0.01                                    | 110 ± 5    |
| Zn                          | 44.9 ± 2.3                             | 44 ± 2                                         | 98 ± 5     |

a) ICP-OES; b) ICP-MS
